# Supplementary material for: Duration of colonization with antimicrobial-resistant bacteria after ICU discharge
Source: Springer Nature journal article supplement (doi:10.1007/s00134-014-3225-8), 2014-02-12
Supplement: MOESM1 [file 8122996]

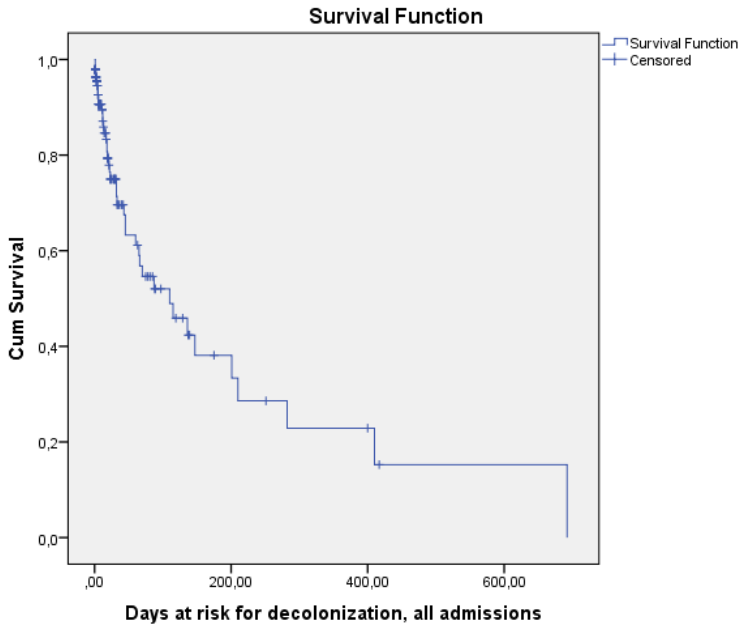

**Supplementary Figure 1: All AMRB**

141 colonization episodes, Kaplan-Meier method  
 Median duration of colonization: 110.0 days (43.7 – 176.3)

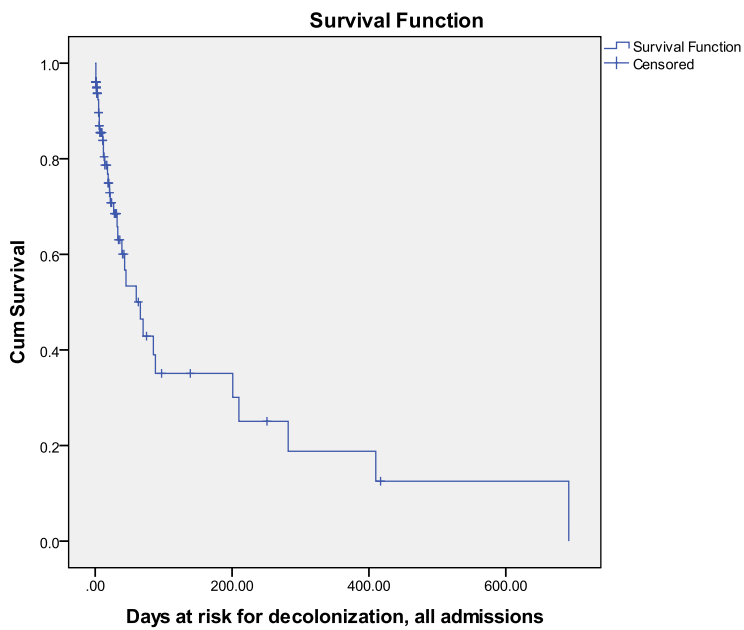

**Supplementary Figure 2: HRE**

101 colonization episodes, Kaplan-Meier method  
 Median duration of colonization: 66.0 days (35.1 – 96.9)

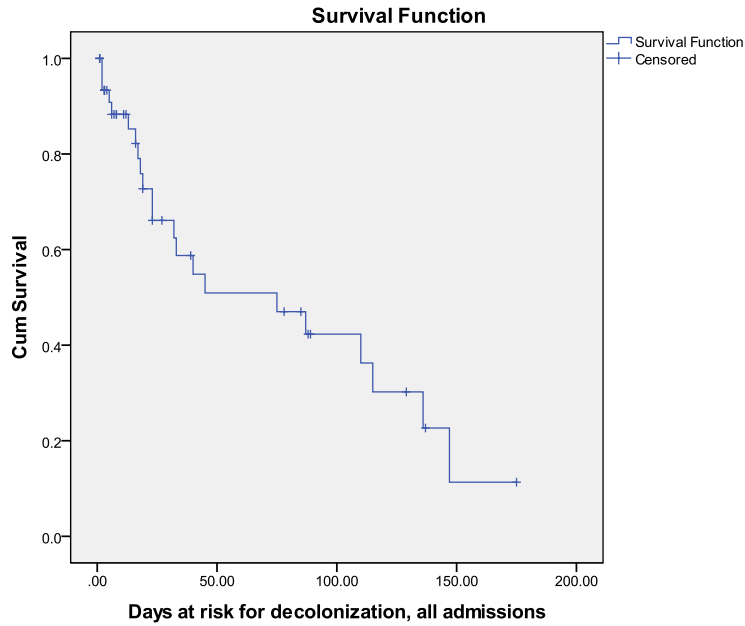

**Supplementary Figure 3: MRSA**

48 colonization episodes, Kaplan-Meier method  
 Median duration of colonization: 75.0 days (15.4 – 134.6)

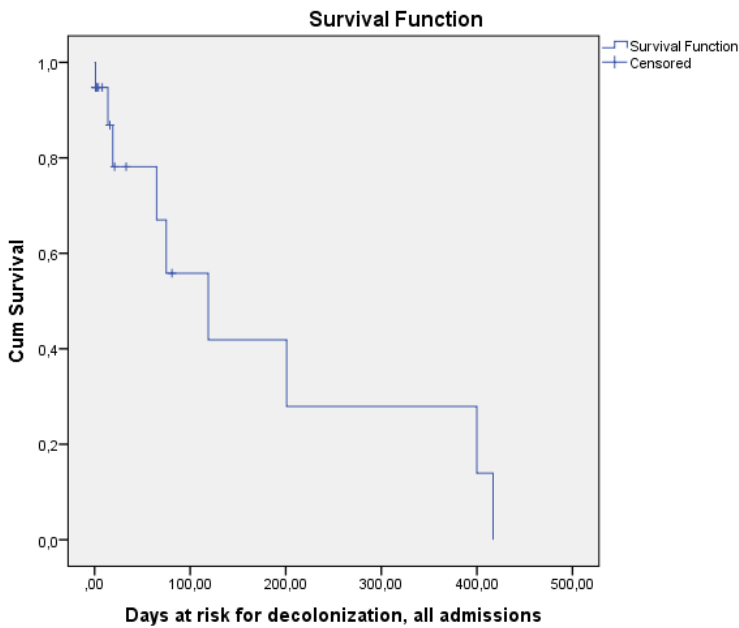

**Supplementary Figure 4: VRE**

19 colonization episodes, Kaplan-Meier method  
 Median duration of colonization: 119.0 days (14.8 – 223.2)
